# Supplementary material for: Quantification of spatial and phenotypic heterogeneity in an agent-based model of tumour-macrophage interactions
Source: PubMed Central journal article supplement (PMC10079237; doi:10.1371/journal.pcbi.1010994), 2023-03-27
Supplement: pcbi.1010994.s003.pdf [file pcbi.1010994.s003.pdf]

### S3 Appendix: Derivation of PCFs and Cross-PCFs from wPCF

In the main text, we use the wPCF to identify correlations between a continuous label (phenotype) and a categorical one (cell type). We now explain how we can extend it to study correlations between two continuous labels. Consider two labels  $u$  and  $v$  associated with each cell, which may be continuous or discrete. For two target marks  $U$  and  $V$ , the wPCF in its most general form can be written as:

$$wPCF(r, U, V) = \frac{1}{W_U W_V} \sum_{i=1}^N \sum_{j=1}^N \frac{A}{A_{r_k}(\mathbf{x}_i)} w_u(U, u_i) w_v(V, v_j) I_{[r_k, r_{k+1})}(|\mathbf{x}_i - \mathbf{x}_j|) \quad (1)$$

where  $w_u$  and  $w_v$  are weighting functions, and  $W_U = \sum_i w_u(U, u_i)$  and  $W_V = \sum_i w_v(V, v_i)$  are the total weights associated with each mark. The functional forms of  $w_u$  and  $w_v$  depend on several factors:

- Are  $u$  and  $v$  discrete or continuous marks?
- What are the ranges of  $u$  and  $v$ ?
- At what resolution do we wish to identify correlations?

Through appropriate choices of  $w_U$  and  $w_V$ , Equation (1) reduces to the ordinary PCF, the cross-PCF, or the discrete-continuous form of the wPCF that was introduced in the main text. Table S2 illustrates weighting functions which achieve these different cases.

**Table S2. Choices of  $w$  which simplify the wPCF.** By appropriately choosing  $w_u$  and  $w_v$ , Equation (1) reduces to the wPCF presented in Equation (11), to the cross-PCF in Equation (9), or to the original definition of the PCF.

| Function name | Notation        | $u$ : Discrete? | $v$ : Discrete? | $w_u$                          | $w_v$                                       |
|---------------|-----------------|-----------------|-----------------|--------------------------------|---------------------------------------------|
| PCF           | $g(r)$          | Discrete        | Discrete        | $w_u(U, u_i) = \Theta(U, u_i)$ | $w_v(V, v_i) = \Theta(V, v_i)$ with $u = v$ |
| Cross-PCF     | $g_{UV}(r)$     | Discrete        | Discrete        | $w_u(U, u_i) = \Theta(U, u_i)$ | $w_v(V, v_i) = \Theta(V, v_i)$              |
| wPCF          | $wPCF(r, U, V)$ | Continuous      | Discrete        | $w_u(U, u_i)$                  | $w_v(V, v_i) = \Theta(V, v_i)$              |
| wPCF          | $wPCF(r, U, V)$ | Continuous      | Continuous      | $w_u(U, u_i)$                  | $w_v(V, v_i)$                               |

We note that there is no requirement that  $u$  and  $v$  are different marks in the calculation of the wPCF, and that useful information may be gained from calculating, for example,  $wPCF(r, U, U)$ . This is simply a special case  $wPCF(r, U, V)$  in which  $u = v$ , the the same way as the standard PCF is a special case of the cross-PCF.

As an example, Fig S5 shows the cross-PCFs and wPCFs from Fig 5 in the main text. Through appropriate choice of the weighting function used in the wPCF, the cross-PCFs can be thought of as wPCFs in which the weighting function is piecewise constant as a function of  $P$ .

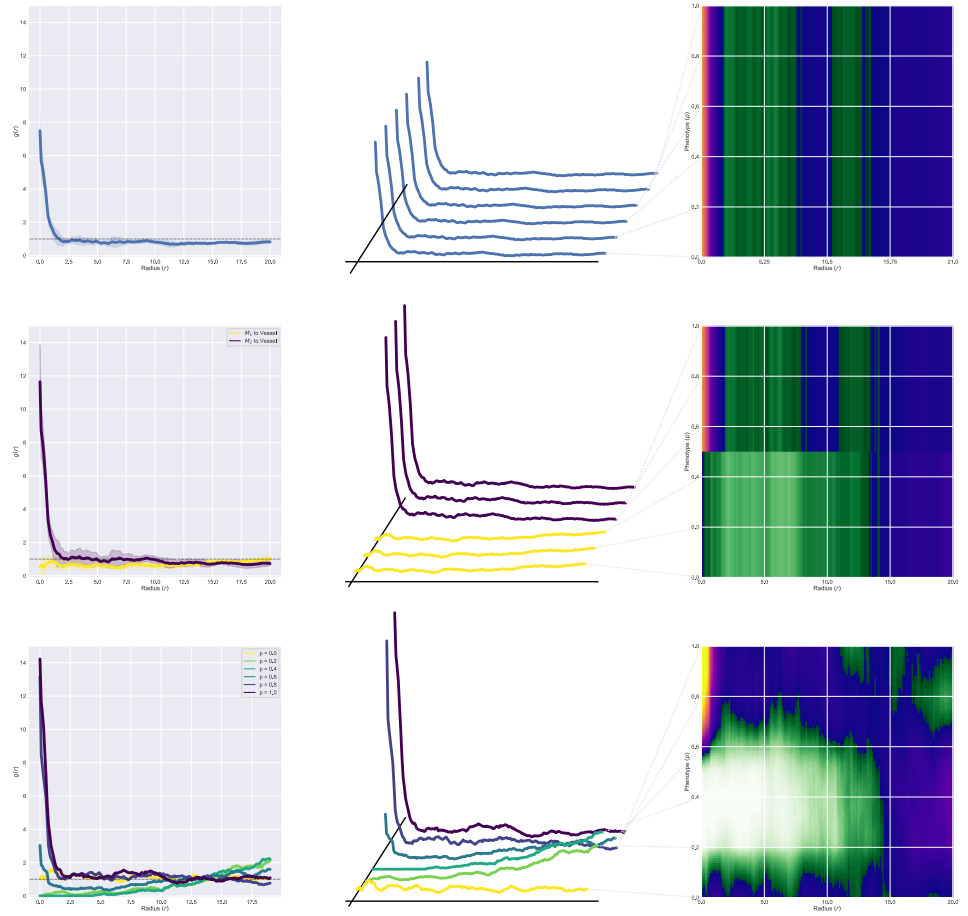

**Fig S5. PCFs and Cross-PCFs can be seen as special cases of the wPCF**  
 Cross- and wPCFs from Fig 5. By appropriately choosing the weighting function  $w$ , the wPCF returns the same results as the cross-PCF.  
 Top row:  $wPCF(r, P, B) = g_{BM}(r)$ , with weighting function  $w(P, p_i) = 1$  for all target phenotypes  $P$  and cell phenotypes  $p_i$ .  
 Middle row:  $wPCF(r, P, B) = g_{BM_1}(r)$  for  $P \leq 0.5$  and  $wPCF(r, P, B) = g_{BM_2}(r)$  for  $P > 0.5$ , with weighting function  $w(P, p_i) = 1$  if  $P$  and  $p_i$  are both above/below 0.5, and 0 if they are on opposite sides.  
 Bottom row: standard wPCF as described in Fig 5.
