# Supplementary material for: Quantification of spatial and phenotypic heterogeneity in an agent-based model of tumour-macrophage interactions
Source: PubMed Central journal article supplement (PMC10079237; doi:10.1371/journal.pcbi.1010994), 2023-03-27
Supplement: pcbi.1010994.s007.pdf [file pcbi.1010994.s007.pdf]

## S7 Appendix: Variation in simulation behaviour for a wider range of parameters

In this appendix we present examples of behaviours generated by the ABM when a wider range of parameters are varied. These represent simulations from the second parameter sweep described in the main text, in which 6 parameter values ( $\chi_c^m$ ,  $\chi_\xi^m$ ,  $\chi_\epsilon^T$ ,  $c_{1/2}$ ,  $P^*$ , and  $g_{\text{crit}}$ ) were chosen uniformly at random. Fig S13 shows some examples of simulations in which macrophage localisation is more diverse than in the examples seen in the 2-parameter sweep.

| Panel | $\chi_c^m$ | $\chi_\xi^m$ | $\chi_\epsilon^T$ | $c_{1/2}$ | $P^*$ | $g_{\text{crit}}$ |
|-------|------------|--------------|-------------------|-----------|-------|-------------------|
| A     | 3.494      | 0.120        | 2.421             | 0.409     | 0.088 | 0.032             |
| B     | 2.731      | 0.190        | 4.784             | 0.458     | 0.011 | 0.919             |
| C     | 2.613      | 0.328        | 3.442             | 0.470     | 0.056 | 0.955             |
| D     | 3.448      | 0.871        | 3.672             | 0.497     | 0.044 | 0.737             |
| E     | 2.942      | 4.074        | 3.404             | 0.356     | 0.011 | 0.517             |
| F     | 1.750      | 3.455        | 1.892             | 0.324     | 0.091 | 0.032             |

**Table S3. Parameters used for simulations in Fig S13** Values of the six parameters randomly selected for each simulation are shown here; other parameters are fixed at the default values given in S1 Appendix

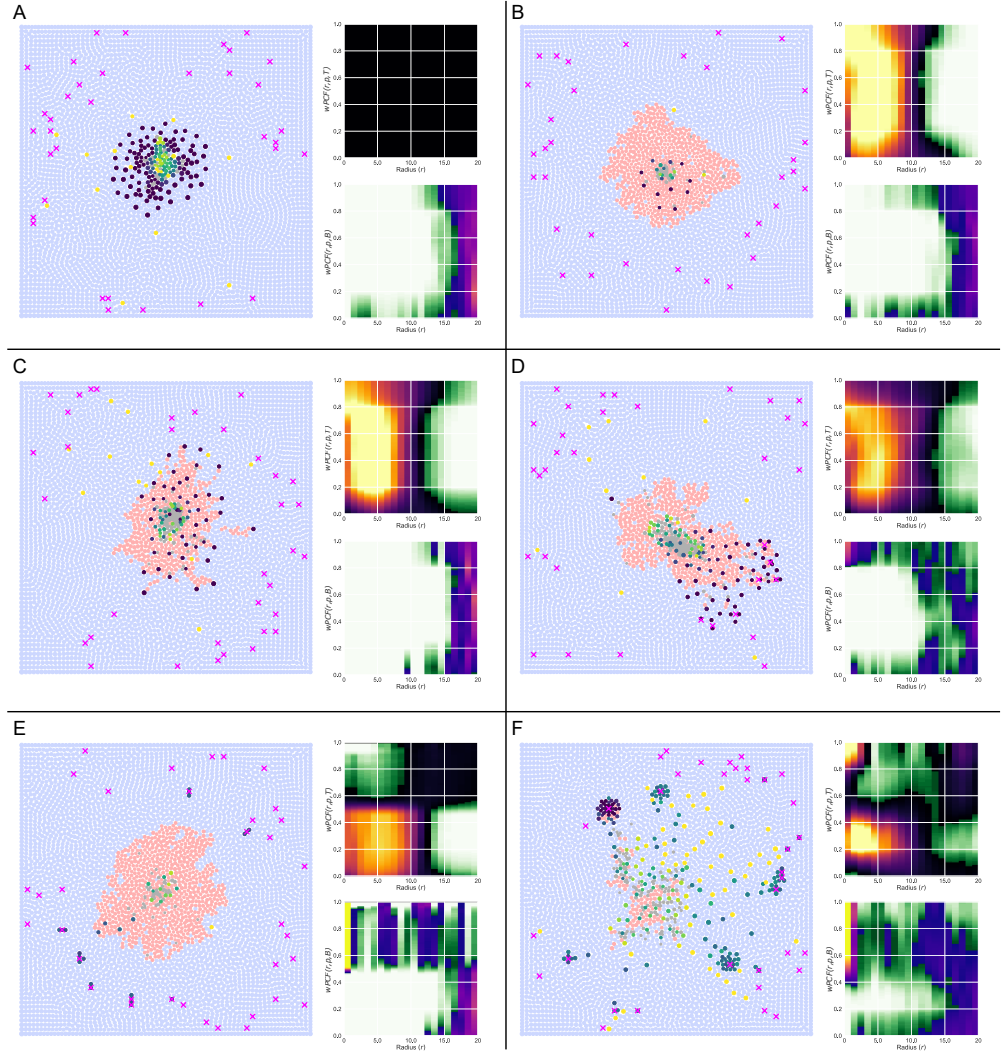

**Fig S13. wPCFs distinguish diverse model behaviours**

The parameter values used to generate the simulations shown in panels A-F are shown in Table S3. The model generates a wide range of simulation behaviours. Panels show cell locations at  $t = 500$ , with insets of  $wPCF(r, P, T)$  (top) and  $wPCF(r, P, B)$  (bottom).

- A: Tumour elimination in which  $M_2$ -like macrophages do not localise around blood vessels.
- B: Compact tumour growth in which  $M_2$ -like macrophages remain localised within the tumour mass.
- C: Diffuse tumour growth in which  $M_2$ -like macrophages direct the migration of streams of tumour cells away from the tumour mass.
- D: Diffuse tumour growth in which a large cluster of  $M_2$ -like macrophages directs tumour cells to localise around blood vessels.
- E:  $M_2$ -like macrophages migrate towards blood vessels with a low phenotype ( $p \approx 0.5$ ) and hence do not recruit tumour cells.
- F:  $M_2$ -like macrophages with phenotypes in the range  $0.5 < p \leq 1$  localise around blood vessels, and are accompanied by tumour cells only if the perivascular macrophages have  $p \approx 1$ .
